# Supplementary material for: Transient Receptor Potential Vanilloid 1 Activation Enhances Gut Glucagon-Like Peptide-1 Secretion and Improves Glucose Homeostasis
Source: PubMed Central journal article supplement — Diabetes. 2012 Jul 17;61(8):2155–65. doi: 10.2337/db11-1503 (PMC3402317; doi:10.2337/db11-1503), 2012-07-17

SUPPLEMENTARY DATA

**Supplementary Figure 1.** Voltage-dependent  $\text{Ca}^{2+}$  channel is partially involved in capsaicin mediated GLP-1 secretion in STC-1 cells. The effects of verapamil (10  $\mu\text{M}$ ) and nifedipine (10  $\mu\text{M}$ ) on the GLP-1 release in response to capsaicin (1  $\mu\text{M}$ ). \*\* $P < 0.01$  versus capsaicin group (Cap), ### $P < 0.01$  versus control group (Cont, n=6).

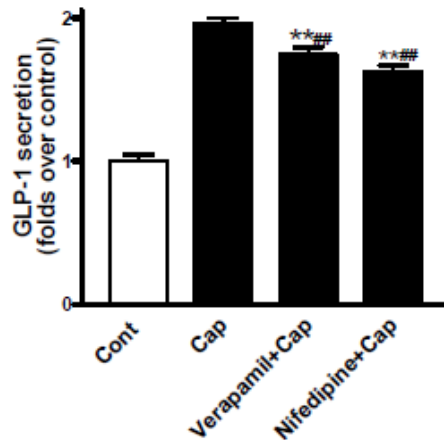

**Supplementary Figure 2.** The circulating levels of GIP, Glucagon and PYY did not increased after acute oral administration of capsaicin. A, B and C: Plasma levels of GIP, Glucagon and PYY at 30 minutes after acute oral administration of capsaicin (1  $\mu\text{M}$ ) in the presence of glucose (2 g/kg) in C57BL/6J mice (n=6).

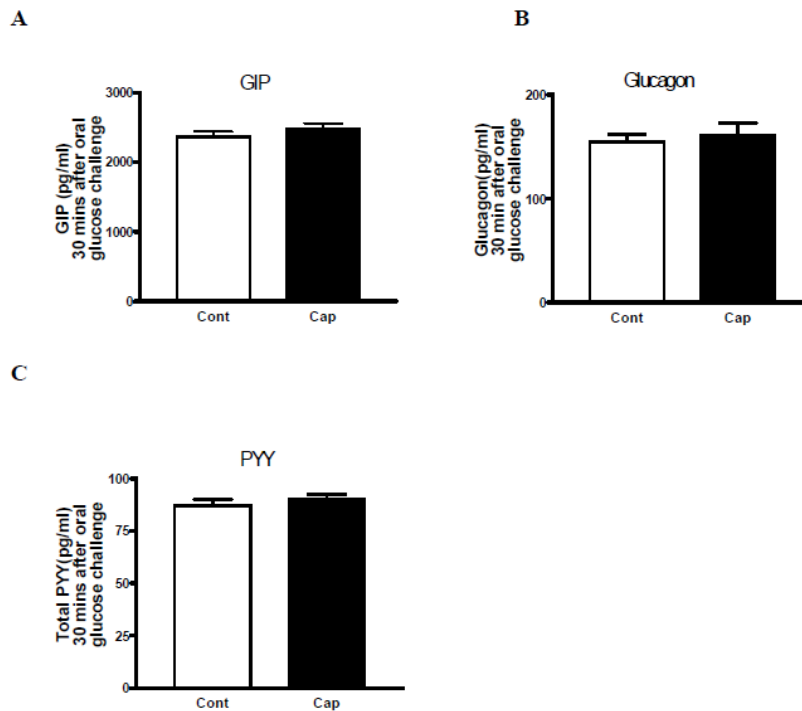

SUPPLEMENTARY DATA

**Supplementary Figure 3.** Acute administration of capsaicin increased the GLP-1 secretion in C57BL/6J mice. Plasma levels of GLP-1 after gastric gavage in the absence or presence of glucose challenge (2 g/kg) combine with or without capsaicin (1  $\mu$ M). # $P < 0.05$  versus the presence of glucose challenge control group (Cont G<sup>+</sup>; n=6); \* $P < 0.05$  versus the absence of glucose challenge control group (Cont G<sup>-</sup>; n=6), data are mean  $\pm$  SEM and were analyzed by student's unpaired t-test.

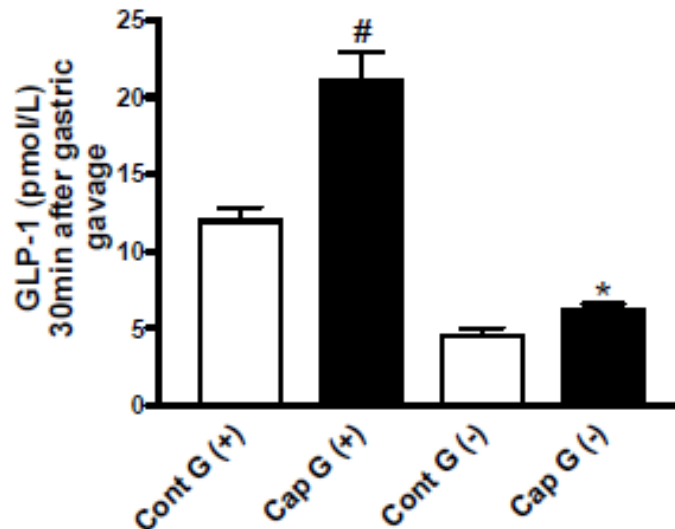

**Supplementary Figure 4.** The insulinotropic effect of capsaicin was blocked by exendin (9-39). A: Plasma levels of insulin in C57BL/6J mice after acute oral glucose (2 g/kg) combine with or without capsaicin (1  $\mu$ M), in pretreatment with or without GLP-1 receptor antagonist, exendin (9-39) (10  $\mu$ g/mouse, i.p.) (n=6). # $P < 0.05$  versus control group (n=6), \* $P < 0.05$  versus exendin (9-39) plus capsaicin group (n=6). B: Plasma levels of insulin after gastric gavage in the absence of glucose challenge combine with or without capsaicin (1  $\mu$ M), in pretreatment with or without GLP-1 receptor antagonist, exendin (9-39) in wild type mice (10  $\mu$ g/mouse, i.p.) (n=6). # $P < 0.05$  versus control group (n=6), \* $P < 0.05$  versus exendin (9-39) plus capsaicin group (n=6). Data are represented as mean  $\pm$  SEM and were analyzed by Student's unpaired t-test.

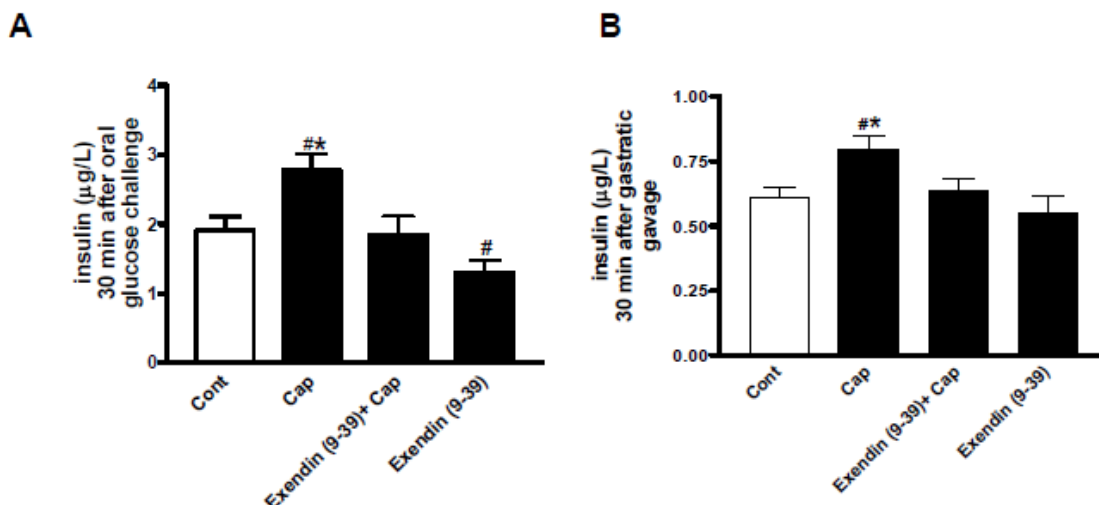

SUPPLEMENTARY DATA

**Supplementary Figure 5.** Sitagliptin maximize the effects of capsaicin in GLP-1 secretion. Plasma levels of GLP-1 in C57BL/6J mice after acute glucose challenge with or without capsaicin, in presence or absence of DPP4 inhibitor, sitagliptin (3mg/kg, oral),  $**P < 0.01$  versus control group,  $^{\#}P < 0.05$  versus capsaicin group (n=6), data are represented as mean  $\pm$  SEM and were analyzed by Student's unpaired t-test.

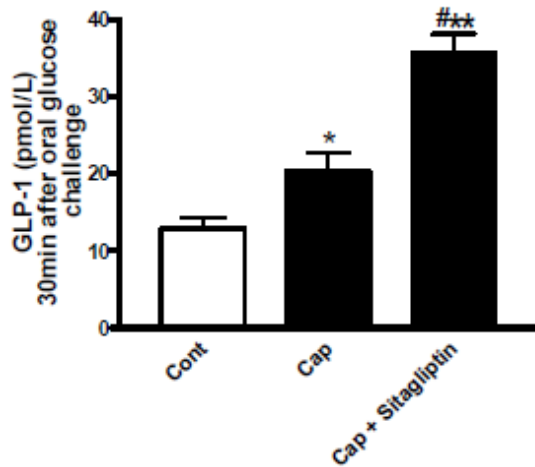

**Supplementary Figure 6.** The body weights of WT and TRPV1<sup>-/-</sup> mice after 24 weeks of treatment with or without capsaicin (n=6).

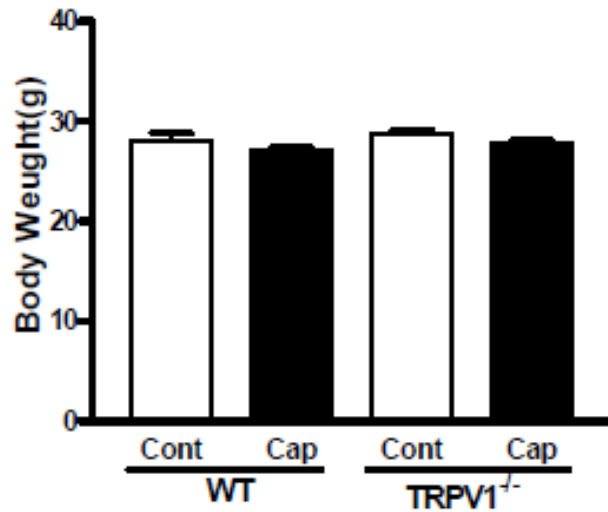

SUPPLEMENTARY DATA

**Supplementary Figure 7.** *A:* The food intake of db/db mice in the first 14 days of treatment with or without capsaicin (0.01%). *B:* The body weights of db/db mice during 14 weeks of treatment with or without capsaicin (n=6). \**P*<0.05 versus control. *C:* IPITT of the db/db control mice, db/db mice treated with chronic capsaicin, lean littermate, \**P*<0.05 versus db/db control, \*\**P*<0.01 versus db/db control (n=6). These data are represented as means ± SEM and were analyzed with a Student's unpaired t-test. *D :* The GLP-1 levels after a 30-min glucose challenge in db/db mice treated with or without capsaicin and the lean littermate control, \**P*<0.05 versus db/db control (n=6).

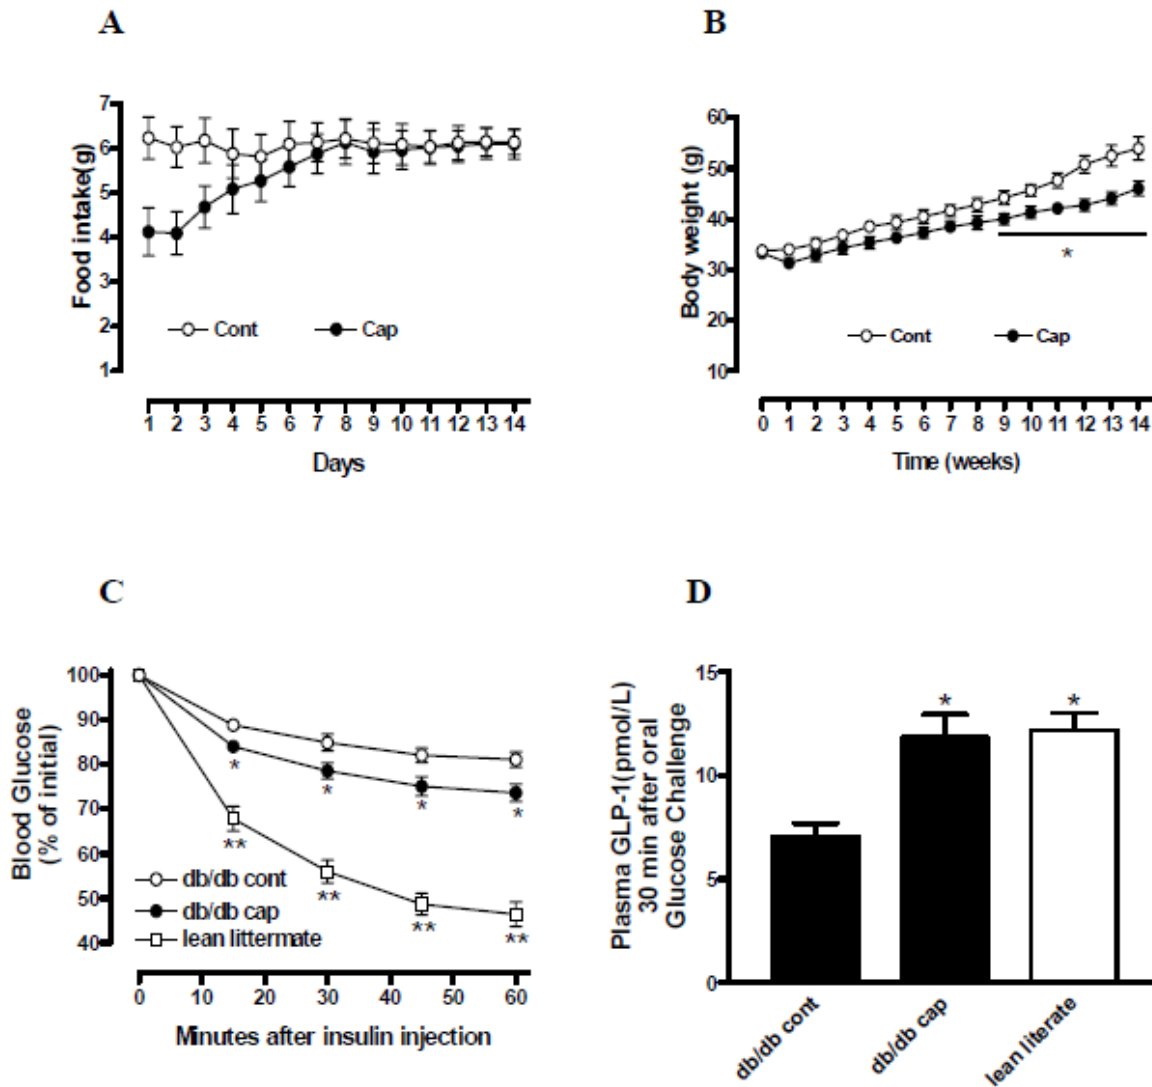

Supplement: supp_db11-1503_DB111503SupplementaryData.pdf [file supp_db11-1503_DB111503SupplementaryData.pdf]
